# Supplementary material for: RAD18 promotes DNA double-strand break repair during G1 phase through chromatin retention of 53BP1
Source: PubMed Central journal article supplement — Nucleic Acids Res. 2009 Feb 19;37(7):2176–93. doi: 10.1093/nar/gkp082 (PMC2673428; doi:10.1093/nar/gkp082), 2009-02-19
Supplement: gkp082_6.pdf [file gkp082_6.pdf]

### **Supplementary Figure legends**

**Supplementary Figure 1.** Effects of siRNA knockdown of 53BP1 in MCF7 cells. MCF7 cells were treated with a control or 53BP1-specific siRNA. After incubation for the indicated time periods, 53BP1 and RAD18 protein levels were examined by Western blotting with  $\alpha$ -53BP1 and  $\alpha$ -RAD18 antibody, respectively. The expression levels of  $\alpha$ -tubulin were used as a loading control.

**Supplementary Figure 2.** (A) The FACS analysis of wild-type (wt, shown as WT) and 53BP1-null cells (53BP1KO). The cell cycle profile of asynchronous or confluent WT and 53BP1-null MEFs was determined by FACS. (B) HeLa cells were synchronized in S, G2/M and G1 phase by a double thymidine block. The synchronization efficiency of the cells was verified by FACS analysis.

**Supplementary Figure 3.** Cell cycle-dependent interaction between RAD18 and 53BP1. HeLa cells were synchronized in S, G2/M or G1 phase by a single thymidine block. Then, the cells were exposed to X-rays (10 Gy), and cultured for 2 h. The nuclear extracts were prepared from the cells and were used for immunoprecipitation with anti-RAD18 antibodies (Abs) or control IgG. The 53BP1 protein levels were then examined by Western blotting using anti-53BP1 Abs.

**Supplementary Figure 4.** (A) Synchronous cell-cycle progression of G1-synchronized cells. Asynchronous (AS) and synchronous cells were pulse-labeled with BrdU for 5 min before being harvested. The harvested cells were fixed and stained with fluorescein isothiocyanate-conjugated anti-BrdU antibodies (Abs) and propidium iodide. Cells synchronized in G1 phase were released into the cell cycle at time 0 then pulse-labeled with BrdU at the indicated time points after cell-cycle release. The upper, lower-left, and lower-right gates in each panel correspond to cells in S, G1, and G2/M phase, respectively. The percentage of cells in each gate is indicated. (B) Flow cytometric analysis of G1-synchronized cells. The indicated cells were synchronized in G1 phase with mimosine after release from nocodazole treatment. After release from mimosine-induced arrest, cells were pulse-labeled with BrdU for 5 min. The cells were then harvested, fixed and stained with fluorescein isothiocyanate-conjugated anti-BrdU Abs and propidium iodide. The upper, lower-left, and lower-right gates in each panel correspond to cells in S, G1, and G2/M phase, respectively. The percentage of cells in

each gate is indicated.

**Supplementary Figure 5.** The kinetics of IR-induced Rad18 foci formation during G1 phase. Wild-type MEFs were cultured until confluent for synchronization at G1-phase. Cells were X-irradiated (2 Gy) in the presence (+PKi) or absence (-PKi) of DNA-PKcs inhibitor and cultured for the indicated time. The cells or non-irradiated cells (0 h) were fixed, and then the Rad18 foci were visualized by immunofluorescence staining using anti-hRAD18 antibody. The number of the cells with RAD18 foci was counted.
