# Supplementary figures and images for: RAD18 promotes DNA double-strand break repair during G1 phase through chromatin retention of 53BP1
Source: PubMed Central journal article supplement — Nucleic Acids Res. 2009 Feb 19;37(7):2176–93. doi: 10.1093/nar/gkp082 (PMC2673428; doi:10.1093/nar/gkp082), 2009-02-19

# Supplementary Figure 1

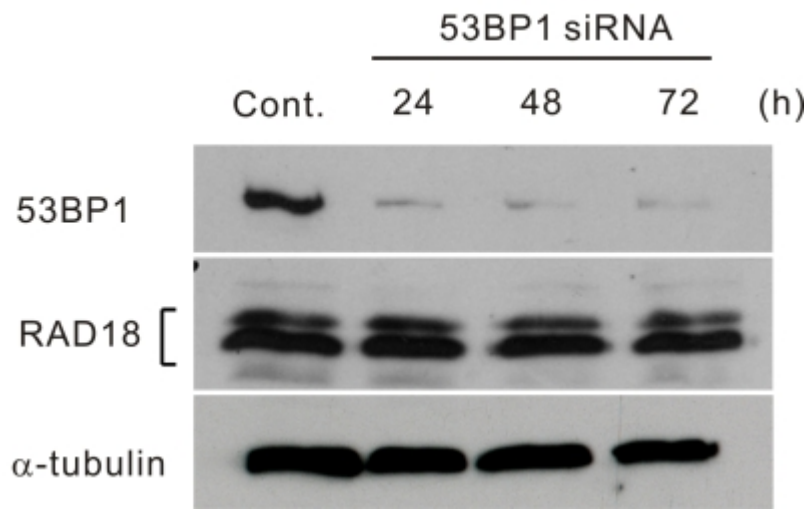

Supplement: gkp082_1.pdf [file gkp082_1.pdf]

# Supplementary Figure 2

A

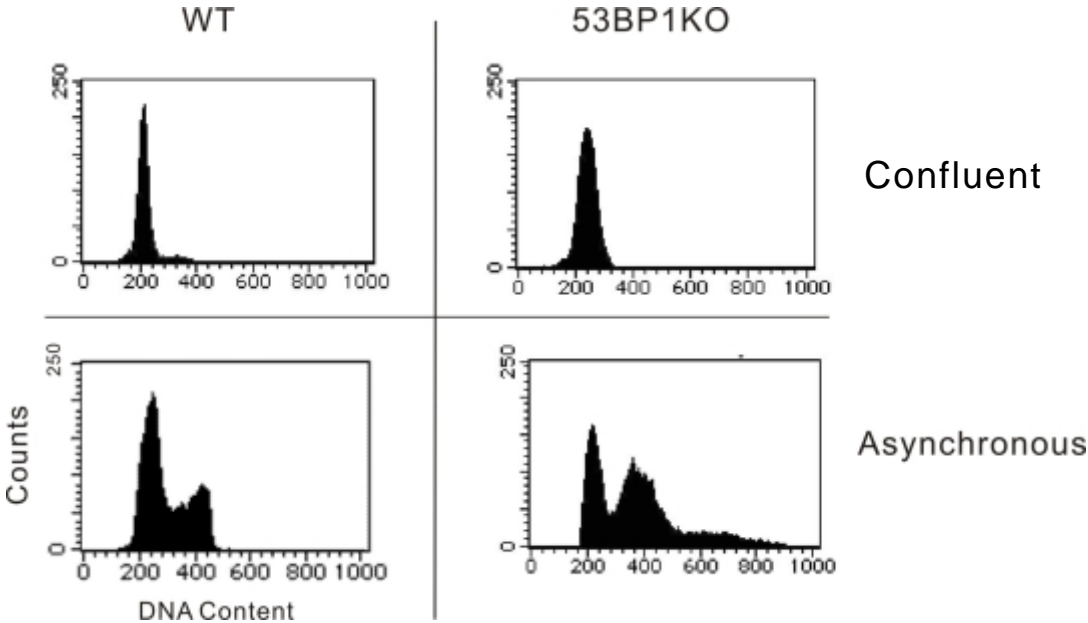

B

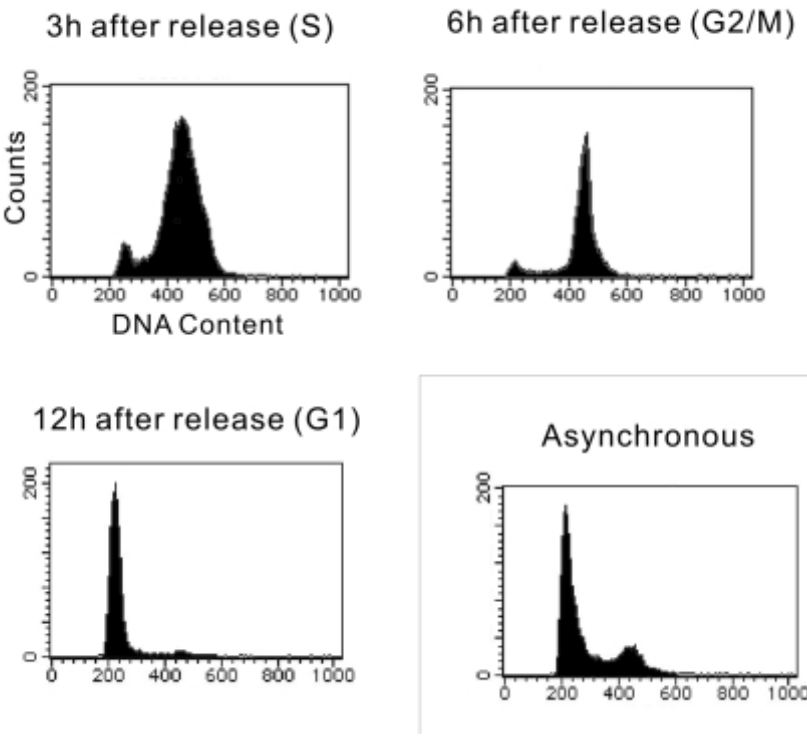

Supplement: gkp082_2.pdf [file gkp082_2.pdf]

# Supplementary Figure 3

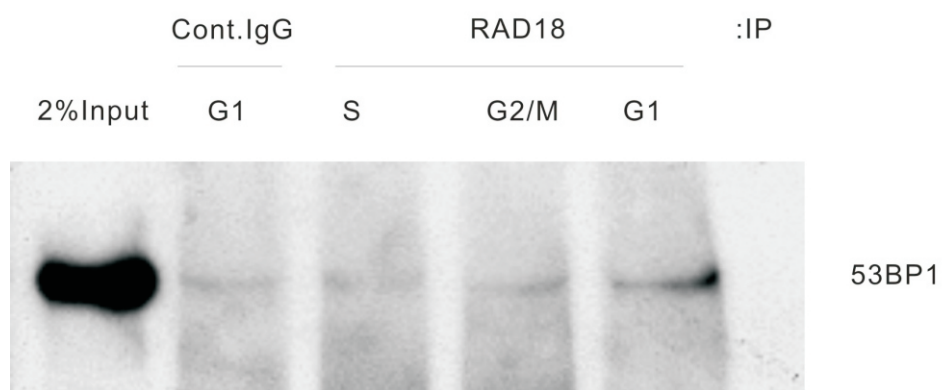

Supplement: gkp082_3.pdf [file gkp082_3.pdf]

Supplementary Figure 4

A

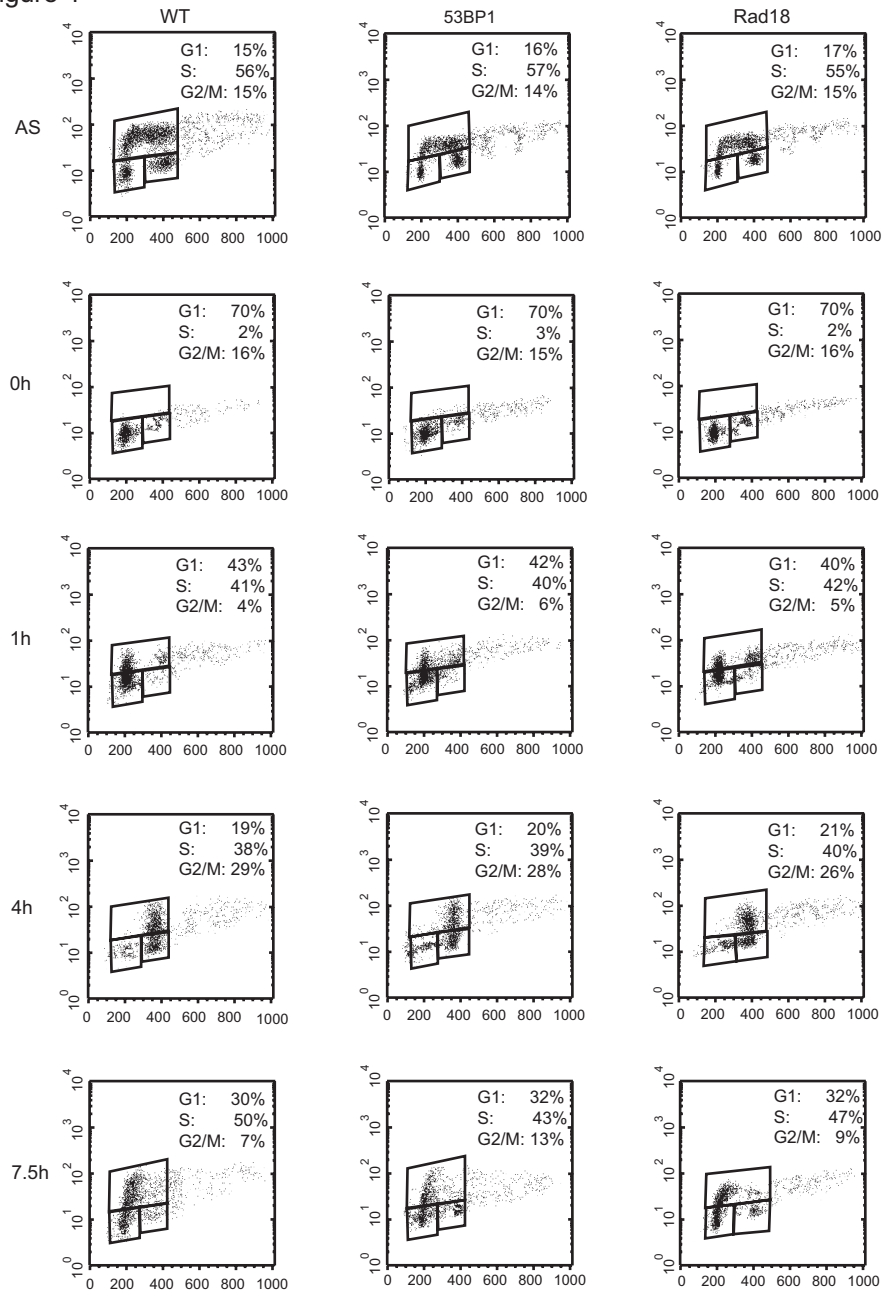

B

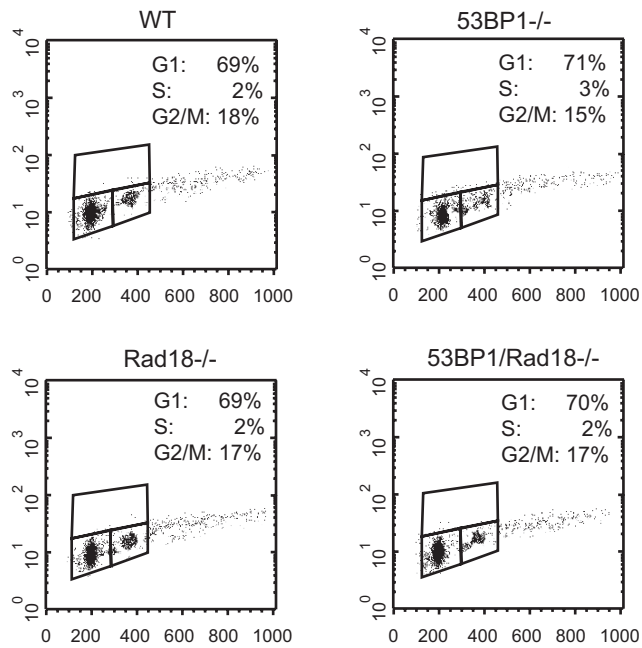

Supplement: gkp082_4.pdf [file gkp082_4.pdf]

# Supplementary Figure 5

Rad18 foci positive cells (%)

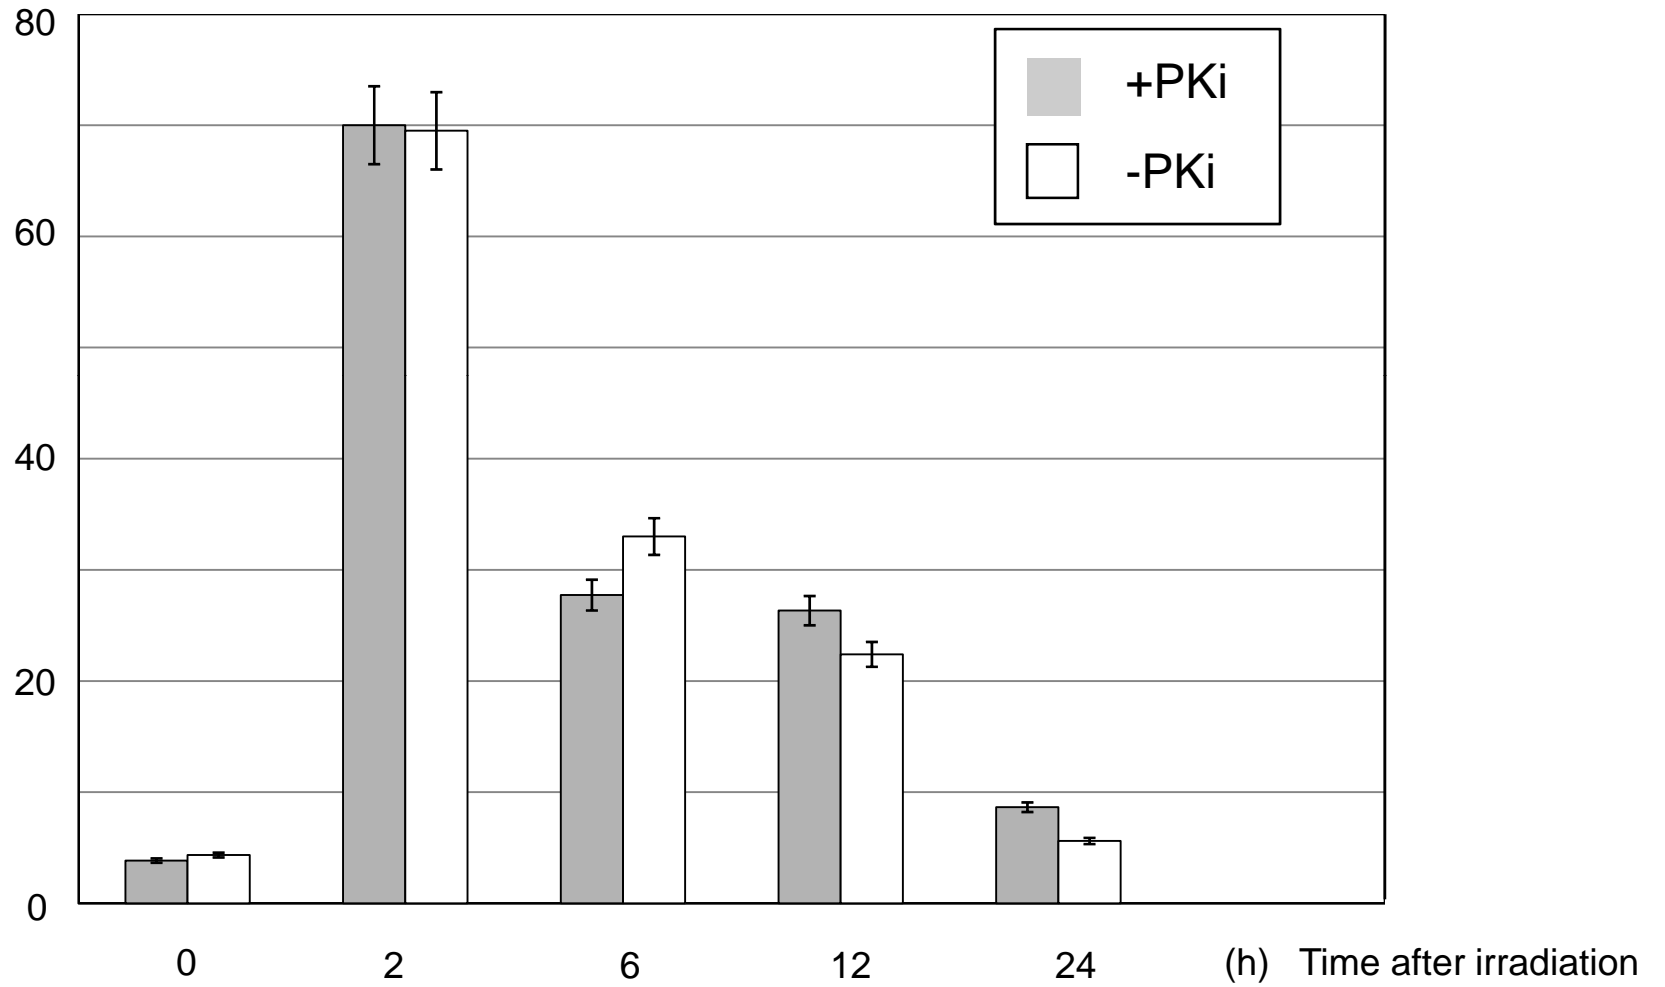

Supplement: gkp082_5.pdf [file gkp082_5.pdf]
